# Supplementary material for: Literature Mining for the Discovery of Hidden Connections between Drugs, Genes and Diseases
Source: PLoS Comput Biol. 2010 Sep 23;6(9):e1000943. doi: 10.1371/journal.pcbi.1000943 (PMC2944780; doi:10.1371/journal.pcbi.1000943)
Supplement: Table S1 — ROC curve data used to validate CoPub Discovery - This supplementary table contains the raw data of the ROC curve analysis to validate CoPub Discovery for Disease-Gene, Drug-Disease and Drug-Biological Process hidden relationships, for several B-node inclusion criteria. The true positive rate (TPR) was calculated as: TPR = TP/TP+FN, and the false positive rate (FPR) was calculated as: FPR = FP/FP+TN (TP = True positive, FN = False negative, FP = False positive and TN = True negative). (0.17 MB XLS) [file pcbi.1000943.s001.xls]

## Sheet: Disease - Gene
	Settings 1: Minimal 3 co-publications and R-scaled score >= 20								Settings 1: Minimal 3 co-publications and R-scaled score >= 20								Settings 2: Minimal 2 co-publications and R-scaled score >= 20								Settings 2: Minimal 2 co-publications and R-scaled score >= 20								Settings 3: Minimal 1 co-publications and R-scaled score >= 20								Settings 3: Minimal 1 co-publications and R-scaled score >= 20								Settings 4: Minimal 1 co-publications and R-scaled score >= 35
	Area Under Curve (AUC): 0.83								Area Under Curve (AUC): 0.84								Area Under Curve (AUC): 0.80								Area Under Curve (AUC): 0.81								Area Under Curve (AUC): 0.75								Area Under Curve (AUC): 0.76								Area Under Curve (AUC): 0.68
	Intermediates: genes only										Intermediates: genes, biological processes and pathways						Intermediates: genes only								Intermediates: genes, biological processes and pathways								Intermediates: genes only								Intermediates: genes, biological processes and pathways								Intermediates: genes only
	Positive		Negative						Positive		Negative						Positive		Negative						Positive		Negative						Positive		Negative						Positive		Negative						Positive
Inferred R-scaled score	Below cutoff	Above cutoff	Below cutoff	Above cutoff	True positive rate	False positive rate		Inferred R-scaled score	Below cutoff	Above cutoff	Below cutoff	Above cutoff	True positive rate	False positive rate		Inferred R-scaled score	Below cutoff	Above cutoff	Below cutoff	Above cutoff	True positive rate	False positive rate		Inferred R-scaled score	Below cutoff	Above cutoff	Below cutoff	Above cutoff	True positive rate	False positive rate		Inferred R-scaled score	Below cutoff	Above cutoff	Below cutoff	Above cutoff	True positive rate	False positive rate		Inferred R-scaled score	Below cutoff	Above cutoff	Below cutoff	Above cutoff	True positive rate	False positive rate		Inferred R-scaled score	Below cutoff
20	0	1000	0	1000	1000	1000		20	0	1000	0	1000	1000	1000		20	0	1000	0	1000	1000	1000		20	0	1000	0	1000	1000	1000		20	0	1000	0	1000	1000	1000		20	0	1000	0	1000	1000	1000		20	0
21	0	1000	0	1000	1000	1000		21	0	1000	0	1000	1000	1000		21	0	1000	0	1000	1000	1000		21	0	1000	0	1000	1000	1000		21	0	1000	0	1000	1000	1000		21	0	1000	0	1000	1000	1000		21	0
22	0	1000	2	998	1000	0.998		22	0	1000	0	1000	1000	1000		22	1	999	4	996	0.999	0.996		22	0	1000	3	997	1000	0.997		22	0	1000	1	999	1000	0.999		22	0	1000	0	1000	1000	1000		22	0
23	1	999	7	993	0.999	0.993		23	0	1000	17	983	1000	0.983		23	2	998	10	990	0.998	0.990		23	1	999	11	989	0.999	0.989		23	3	997	7	993	0.997	0.993		23	1	999	4	996	0.999	0.996		23	0
24	3	997	33	967	0.997	0.967		24	1	999	37	963	0.999	0.963		24	2	998	31	969	0.998	0.969		24	3	997	26	974	0.997	0.974		24	4	996	17	983	0.996	0.983		24	8	992	22	978	0.992	0.978		24	0
25	5	995	60	940	0.995	0.940		25	4	996	77	923	0.996	0.923		25	11	989	67	933	0.989	0.933		25	6	994	74	926	0.994	0.926		25	19	981	43	957	0.981	0.957		25	17	983	74	926	0.983	0.926		25	0
26	17	983	141	859	0.983	0.859		26	12	988	167	833	0.988	0.833		26	21	979	148	852	0.979	0.852		26	19	981	158	842	0.981	0.842		26	46	954	111	889	0.954	0.889		26	35	965	147	853	0.965	0.853		26	0
27	31	969	236	764	0.969	0.764		27	33	967	281	719	0.967	0.719		27	35	965	243	757	0.965	0.757		27	39	961	273	727	0.961	0.727		27	82	918	213	787	0.918	0.787		27	67	933	256	744	0.933	0.744		27	0
28	49	951	353	647	0.951	0.647		28	57	943	416	584	0.943	0.584		28	63	937	347	653	0.937	0.653		28	73	927	408	592	0.927	0.592		28	114	886	347	653	0.886	0.653		28	105	895	365	635	0.895	0.635		28	0
29	77	923	459	541	0.923	0.541		29	94	906	529	471	0.906	0.471		29	110	890	480	520	0.890	0.520		29	112	888	532	468	0.888	0.468		29	168	832	462	538	0.832	0.538		29	160	840	495	505	0.840	0.505		29	0
30	117	883	582	418	0.883	0.418		30	147	853	632	368	0.853	0.368		30	153	847	613	387	0.847	0.387		30	182	818	653	347	0.818	0.347		30	241	759	589	411	0.759	0.411		30	246	754	602	398	0.754	0.398		30	0
31	177	823	690	310	0.823	0.310		31	201	799	730	270	0.799	0.270		31	234	766	704	296	0.766	0.296		31	248	752	753	247	0.752	0.247		31	320	680	689	311	0.680	0.311		31	355	645	702	298	0.645	0.298		31	0
32	246	754	788	212	0.754	0.212		32	276	724	825	175	0.724	0.175		32	312	688	803	197	0.688	0.197		32	337	663	829	171	0.663	0.171		32	409	591	773	227	0.591	0.227		32	462	538	793	207	0.538	0.207		32	0
33	336	664	843	157	0.664	0.157		33	355	645	897	103	0.645	0.103		33	399	601	867	133	0.601	0.133		33	425	575	884	116	0.575	0.116		33	539	461	862	138	0.461	0.138		33	567	433	852	148	0.433	0.148		33	0
34	431	569	899	101	0.569	0.101		34	458	542	931	69	0.542	0.069		34	506	494	922	78	0.494	0.078		34	533	467	926	74	0.467	0.074		34	652	348	909	91	0.348	0.091		34	686	314	899	101	0.314	0.101		34	0
35	525	475	934	66	0.475	0.066		35	539	461	953	47	0.461	0.047		35	618	382	942	58	0.382	0.058		35	632	368	956	44	0.368	0.044		35	742	258	935	65	0.258	0.065		35	778	222	933	67	0.222	0.067		35	0
36	618	382	961	39	0.382	0.039		36	636	364	973	27	0.364	0.027		36	710	290	968	32	0.290	0.032		36	717	283	970	30	0.283	0.030		36	805	195	959	41	0.195	0.041		36	825	175	961	39	0.175	0.039		36	1
37	723	277	975	25	0.277	0.025		37	732	268	982	18	0.268	0.018		37	784	216	983	17	0.216	0.017		37	775	225	984	16	0.225	0.016		37	848	152	976	24	0.152	0.024		37	858	142	972	28	0.142	0.028		37	37
38	793	207	984	16	0.207	0.016		38	794	206	990	10	0.206	0.010		38	839	161	988	12	0.161	0.012		38	835	165	991	9	0.165	0.009		38	896	104	985	15	0.104	0.015		38	890	110	983	17	0.110	0.017		38	149
39	855	145	989	11	0.145	0.011		39	839	161	993	7	0.161	0.007		39	877	123	993	7	0.123	0.007		39	872	128	994	6	0.128	0.006		39	919	81	991	9	0.081	0.009		39	919	81	984	16	0.081	0.016		39	330
40	882	118	993	7	0.118	0.007		40	872	128	996	4	0.128	0.004		40	900	100	995	5	0.100	0.005		40	902	98	995	5	0.098	0.005		40	930	70	994	6	0.070	0.006		40	937	63	991	9	0.063	0.009		40	532
41	913	87	997	3	0.087	0.003		41	905	95	998	2	0.095	0.002		41	922	78	995	5	0.078	0.005		41	929	71	998	2	0.071	0.002		41	953	47	996	4	0.047	0.004		41	954	46	994	6	0.046	0.006		41	659
42	932	68	997	3	0.068	0.003		42	930	70	999	1	0.070	0.001		42	938	62	997	3	0.062	0.003		42	942	58	998	2	0.058	0.002		42	963	37	997	3	0.037	0.003		42	962	38	995	5	0.038	0.005		42	777
43	953	47	999	1	0.047	0.001		43	949	51	999	1	0.051	0.001		43	952	48	999	1	0.048	0.001		43	961	39	998	2	0.039	0.002		43	970	30	999	1	0.030	0.001		43	970	30	997	3	0.030	0.003		43	855
44	965	35	999	1	0.035	0.001		44	960	40	999	1	0.040	0.001		44	960	40	999	1	0.040	0.001		44	967	33	999	1	0.033	0.001		44	980	20	999	1	0.020	0.001		44	979	21	997	3	0.021	0.003		44	904
45	973	27	1000	0	0.027	0.000		45	968	32	999	1	0.032	0.001		45	967	33	999	1	0.033	0.001		45	975	25	999	1	0.025	0.001		45	986	14	999	1	0.014	0.001		45	983	17	998	2	0.017	0.002		45	920
46	977	23	1000	0	0.023	0.000		46	975	25	999	1	0.025	0.001		46	978	22	999	1	0.022	0.001		46	984	16	999	1	0.016	0.001		46	990	10	999	1	0.010	0.001		46	987	13	998	2	0.013	0.002		46	947
47	982	18	1000	0	0.018	0.000		47	983	17	999	1	0.017	0.001		47	980	20	999	1	0.020	0.001		47	990	10	999	1	0.010	0.001		47	991	9	1000	0	0.009	0.000		47	993	7	998	2	0.007	0.002		47	964
48	983	17	1000	0	0.017	0.000		48	987	13	999	1	0.013	0.001		48	986	14	999	1	0.014	0.001		48	993	7	999	1	0.007	0.001		48	992	8	1000	0	0.008	0.000		48	994	6	998	2	0.006	0.002		48	970
49	987	13	1000	0	0.013	0.000		49	992	8	999	1	0.008	0.001		49	996	4	1000	0	0.004	0.000		49	999	1	999	1	0.001	0.001		49	994	6	1000	0	0.006	0.000		49	994	6	999	1	0.006	0.001		49	976
50	993	7	1000	0	0.007	0.000		50	995	5	999	1	0.005	0.001		50	996	4	1000	0	0.004	0.000		50	999	1	1000	0	0.001	0.000		50	996	4	1000	0	0.004	0.000		50	995	5	999	1	0.005	0.001		50	983
51	993	7	1000	0	0.007	0.000		51	997	3	999	1	0.003	0.001		51	997	3	1000	0	0.003	0.000		51	999	1	1000	0	0.001	0.000		51	996	4	1000	0	0.004	0.000		51	995	5	999	1	0.005	0.001		51	985
52	997	3	1000	0	0.003	0.000		52	997	3	999	1	0.003	0.001		52	998	2	1000	0	0.002	0.000		52	1000	0	1000	0	0.000	0.000		52	996	4	1000	0	0.004	0.000		52	995	5	1000	0	0.005	0.000		52	989
53	998	2	1000	0	0.002	0.000		53	997	3	1000	0	0.003	0.000		53	998	2	1000	0	0.002	0.000		53	1000	0	1000	0	0.000	0.000		53	996	4	1000	0	0.004	0.000		53	995	5	1000	0	0.005	0.000		53	991
54	998	2	1000	0	0.002	0.000		54	997	3	1000	0	0.003	0.000		54	998	2	1000	0	0.002	0.000		54	1000	0	1000	0	0.000	0.000		54	996	4	1000	0	0.004	0.000		54	995	5	1000	0	0.005	0.000		54	993
55	998	2	1000	0	0.002	0.000		55	998	2	1000	0	0.002	0.000		55	998	2	1000	0	0.002	0.000		55	1000	0	1000	0	0.000	0.000		55	996	4	1000	0	0.004	0.000		55	995	5	1000	0	0.005	0.000		55	993
56	998	2	1000	0	0.002	0.000		56	998	2	1000	0	0.002	0.000		56	998	2	1000	0	0.002	0.000		56	1000	0	1000	0	0.000	0.000		56	999	1	1000	0	0.001	0.000		56	996	4	1000	0	0.004	0.000		56	994
57	998	2	1000	0	0.002	0.000		57	998	2	1000	0	0.002	0.000		57	998	2	1000	0	0.002	0.000		57	1000	0	1000	0	0.000	0.000		57	999	1	1000	0	0.001	0.000		57	997	3	1000	0	0.003	0.000		57	994
58	998	2	1000	0	0.002	0.000		58	998	2	1000	0	0.002	0.000		58	999	1	1000	0	0.001	0.000		58	1000	0	1000	0	0.000	0.000		58	999	1	1000	0	0.001	0.000		58	997	3	1000	0	0.003	0.000		58	996
59	998	2	1000	0	0.002	0.000		59	999	1	1000	0	0.001	0.000		59	999	1	1000	0	0.001	0.000		59	1000	0	1000	0	0.000	0.000		59	999	1	1000	0	0.001	0.000		59	998	2	1000	0	0.002	0.000		59	997
60	998	2	1000	0	0.002	0.000		60	999	1	1000	0	0.001	0.000		60	999	1	1000	0	0.001	0.000		60	1000	0	1000	0	0.000	0.000		60	999	1	1000	0	0.001	0.000		60	998	2	1000	0	0.002	0.000		60	997
61	999	1	1000	0	0.001	0.000		61	999	1	1000	0	0.001	0.000		61	999	1	1000	0	0.001	0.000		61	1000	0	1000	0	0.000	0.000		61	1000	0	1000	0	0.000	0.000		61	998	2	1000	0	0.002	0.000		61	999
62	1000	0	1000	0	0.000	0.000		62	999	1	1000	0	0.001	0.000		62	1000	0	1000	0	0.000	0.000		62	1000	0	1000	0	0.000	0.000		62	1000	0	1000	0	0.000	0.000		62	998	2	1000	0	0.002	0.000		62	999
63	1000	0	1000	0	0.000	0.000		63	1000	0	1000	0	0.000	0.000		63	1000	0	1000	0	0.000	0.000		63	1000	0	1000	0	0.000	0.000		63	1000	0	1000	0	0.000	0.000		63	999	1	1000	0	0.001	0.000		63	999
64	1000	0	1000	0	0.000	0.000		64	1000	0	1000	0	0.000	0.000		64	1000	0	1000	0	0.000	0.000		64	1000	0	1000	0	0.000	0.000		64	1000	0	1000	0	0.000	0.000		64	1000	0	1000	0	0.000	0.000		64	1000
65	1000	0	1000	0	0.000	0.000		65	1000	0	1000	0	0.000	0.000		65	1000	0	1000	0	0.000	0.000		65	1000	0	1000	0	0.000	0.000		65	1000	0	1000	0	0.000	0.000		65	1000	0	1000	0	0.000	0.000		65	1000
66	1000	0	1000	0	0.000	0.000		66	1000	0	1000	0	0.000	0.000		66	1000	0	1000	0	0.000	0.000		66	1000	0	1000	0	0.000	0.000		66	1000	0	1000	0	0.000	0.000		66	1000	0	1000	0	0.000	0.000		66	1000
67	1000	0	1000	0	0.000	0.000		67	1000	0	1000	0	0.000	0.000		67	1000	0	1000	0	0.000	0.000		67	1000	0	1000	0	0.000	0.000		67	1000	0	1000	0	0.000	0.000		67	1000	0	1000	0	0.000	0.000		67	1000
68	1000	0	1000	0	0.000	0.000		68	1000	0	1000	0	0.000	0.000		68	1000	0	1000	0	0.000	0.000		68	1000	0	1000	0	0.000	0.000		68	1000	0	1000	0	0.000	0.000		68	1000	0	1000	0	0.000	0.000		68	1000
69	1000	0	1000	0	0.000	0.000		69	1000	0	1000	0	0.000	0.000		69	1000	0	1000	0	0.000	0.000		69	1000	0	1000	0	0.000	0.000		69	1000	0	1000	0	0.000	0.000		69	1000	0	1000	0	0.000	0.000		69	1000
70	1000	0	1000	0	0.000	0.000		70	1000	0	1000	0	0.000	0.000		70	1000	0	1000	0	0.000	0.000		70	1000	0	1000	0	0.000	0.000		70	1000	0	1000	0	0.000	0.000		70	1000	0	1000	0	0.000	0.000		70	1000
71	1000	0	1000	0	0.000	0.000		71	1000	0	1000	0	0.000	0.000		71	1000	0	1000	0	0.000	0.000		71	1000	0	1000	0	0.000	0.000		71	1000	0	1000	0	0.000	0.000		71	1000	0	1000	0	0.000	0.000		71	1000
72	1000	0	1000	0	0.000	0.000		72	1000	0	1000	0	0.000	0.000		72	1000	0	1000	0	0.000	0.000		72	1000	0	1000	0	0.000	0.000		72	1000	0	1000	0	0.000	0.000		72	1000	0	1000	0	0.000	0.000		72	1000
73	1000	0	1000	0	0.000	0.000		73	1000	0	1000	0	0.000	0.000		73	1000	0	1000	0	0.000	0.000		73	1000	0	1000	0	0.000	0.000		73	1000	0	1000	0	0.000	0.000		73	1000	0	1000	0	0.000	0.000		73	1000
74	1000	0	1000	0	0.000	0.000		74	1000	0	1000	0	0.000	0.000		74	1000	0	1000	0	0.000	0.000		74	1000	0	1000	0	0.000	0.000		74	1000	0	1000	0	0.000	0.000		74	1000	0	1000	0	0.000	0.000		74	1000
75	1000	0	1000	0	0.000	0.000		75	1000	0	1000	0	0.000	0.000		75	1000	0	1000	0	0.000	0.000		75	1000	0	1000	0	0.000	0.000		75	1000	0	1000	0	0.000	0.000		75	1000	0	1000	0	0.000	0.000		75	1000
76	1000	0	1000	0	0.000	0.000		76	1000	0	1000	0	0.000	0.000		76	1000	0	1000	0	0.000	0.000		76	1000	0	1000	0	0.000	0.000		76	1000	0	1000	0	0.000	0.000		76	1000	0	1000	0	0.000	0.000		76	1000
77	1000	0	1000	0	0.000	0.000		77	1000	0	1000	0	0.000	0.000		77	1000	0	1000	0	0.000	0.000		77	1000	0	1000	0	0.000	0.000		77	1000	0	1000	0	0.000	0.000		77	1000	0	1000	0	0.000	0.000		77	1000
78	1000	0	1000	0	0.000	0.000		78	1000	0	1000	0	0.000	0.000		78	1000	0	1000	0	0.000	0.000		78	1000	0	1000	0	0.000	0.000		78	1000	0	1000	0	0.000	0.000		78	1000	0	1000	0	0.000	0.000		78	1000
79	1000	0	1000	0	0.000	0.000		79	1000	0	1000	0	0.000	0.000		79	1000	0	1000	0	0.000	0.000		79	1000	0	1000	0	0.000	0.000		79	1000	0	1000	0	0.000	0.000		79	1000	0	1000	0	0.000	0.000		79	1000
80	1000	0	1000	0	0.000	0.000		80	1000	0	1000	0	0.000	0.000		80	1000	0	1000	0	0.000	0.000		80	1000	0	1000	0	0.000	0.000		80	1000	0	1000	0	0.000	0.000		80	1000	0	1000	0	0.000	0.000		80	1000
81	1000	0	1000	0	0.000	0.000		81	1000	0	1000	0	0.000	0.000		81	1000	0	1000	0	0.000	0.000		81	1000	0	1000	0	0.000	0.000		81	1000	0	1000	0	0.000	0.000		81	1000	0	1000	0	0.000	0.000		81	1000
82	1000	0	1000	0	0.000	0.000		82	1000	0	1000	0	0.000	0.000		82	1000	0	1000	0	0.000	0.000		82	1000	0	1000	0	0.000	0.000		82	1000	0	1000	0	0.000	0.000		82	1000	0	1000	0	0.000	0.000		82	1000
83	1000	0	1000	0	0.000	0.000		83	1000	0	1000	0	0.000	0.000		83	1000	0	1000	0	0.000	0.000		83	1000	0	1000	0	0.000	0.000		83	1000	0	1000	0	0.000	0.000		83	1000	0	1000	0	0.000	0.000		83	1000
84	1000	0	1000	0	0.000	0.000		84	1000	0	1000	0	0.000	0.000		84	1000	0	1000	0	0.000	0.000		84	1000	0	1000	0	0.000	0.000		84	1000	0	1000	0	0.000	0.000		84	1000	0	1000	0	0.000	0.000		84	1000
85	1000	0	1000	0	0.000	0.000		85	1000	0	1000	0	0.000	0.000		85	1000	0	1000	0	0.000	0.000		85	1000	0	1000	0	0.000	0.000		85	1000	0	1000	0	0.000	0.000		85	1000	0	1000	0	0.000	0.000		85	1000
86	1000	0	1000	0	0.000	0.000		86	1000	0	1000	0	0.000	0.000		86	1000	0	1000	0	0.000	0.000		86	1000	0	1000	0	0.000	0.000		86	1000	0	1000	0	0.000	0.000		86	1000	0	1000	0	0.000	0.000		86	1000
87	1000	0	1000	0	0.000	0.000		87	1000	0	1000	0	0.000	0.000		87	1000	0	1000	0	0.000	0.000		87	1000	0	1000	0	0.000	0.000		87	1000	0	1000	0	0.000	0.000		87	1000	0	1000	0	0.000	0.000		87	1000
88	1000	0	1000	0	0.000	0.000		88	1000	0	1000	0	0.000	0.000		88	1000	0	1000	0	0.000	0.000		88	1000	0	1000	0	0.000	0.000		88	1000	0	1000	0	0.000	0.000		88	1000	0	1000	0	0.000	0.000		88	1000
89	1000	0	1000	0	0.000	0.000		89	1000	0	1000	0	0.000	0.000		89	1000	0	1000	0	0.000	0.000		89	1000	0	1000	0	0.000	0.000		89	1000	0	1000	0	0.000	0.000		89	1000	0	1000	0	0.000	0.000		89	1000
90	1000	0	1000	0	0.000	0.000		90	1000	0	1000	0	0.000	0.000		90	1000	0	1000	0	0.000	0.000		90	1000	0	1000	0	0.000	0.000		90	1000	0	1000	0	0.000	0.000		90	1000	0	1000	0	0.000	0.000		90	1000
91	1000	0	1000	0	0.000	0.000		91	1000	0	1000	0	0.000	0.000		91	1000	0	1000	0	0.000	0.000		91	1000	0	1000	0	0.000	0.000		91	1000	0	1000	0	0.000	0.000		91	1000	0	1000	0	0.000	0.000		91	1000
92	1000	0	1000	0	0.000	0.000		92	1000	0	1000	0	0.000	0.000		92	1000	0	1000	0	0.000	0.000		92	1000	0	1000	0	0.000	0.000		92	1000	0	1000	0	0.000	0.000		92	1000	0	1000	0	0.000	0.000		92	1000
93	1000	0	1000	0	0.000	0.000		93	1000	0	1000	0	0.000	0.000		93	1000	0	1000	0	0.000	0.000		93	1000	0	1000	0	0.000	0.000		93	1000	0	1000	0	0.000	0.000		93	1000	0	1000	0	0.000	0.000		93	1000
94	1000	0	1000	0	0.000	0.000		94	1000	0	1000	0	0.000	0.000		94	1000	0	1000	0	0.000	0.000		94	1000	0	1000	0	0.000	0.000		94	1000	0	1000	0	0.000	0.000		94	1000	0	1000	0	0.000	0.000		94	1000
95	1000	0	1000	0	0.000	0.000		95	1000	0	1000	0	0.000	0.000		95	1000	0	1000	0	0.000	0.000		95	1000	0	1000	0	0.000	0.000		95	1000	0	1000	0	0.000	0.000		95	1000	0	1000	0	0.000	0.000		95	1000
96	1000	0	1000	0	0.000	0.000		96	1000	0	1000	0	0.000	0.000		96	1000	0	1000	0	0.000	0.000		96	1000	0	1000	0	0.000	0.000		96	1000	0	1000	0	0.000	0.000		96	1000	0	1000	0	0.000	0.000		96	1000
97	1000	0	1000	0	0.000	0.000		97	1000	0	1000	0	0.000	0.000		97	1000	0	1000	0	0.000	0.000		97	1000	0	1000	0	0.000	0.000		97	1000	0	1000	0	0.000	0.000		97	1000	0	1000	0	0.000	0.000		97	1000
98	1000	0	1000	0	0.000	0.000		98	1000	0	1000	0	0.000	0.000		98	1000	0	1000	0	0.000	0.000		98	1000	0	1000	0	0.000	0.000		98	1000	0	1000	0	0.000	0.000		98	1000	0	1000	0	0.000	0.000		98	1000
99	1000	0	1000	0	0.000	0.000		99	1000	0	1000	0	0.000	0.000		99	1000	0	1000	0	0.000	0.000		99	1000	0	1000	0	0.000	0.000		99	1000	0	1000	0	0.000	0.000		99	1000	0	1000	0	0.000	0.000		99	1000
100	1000	0	1000	0	0.000	0.000		100	1000	0	1000	0	0.000	0.000		100	1000	0	1000	0	0.000	0.000		100	1000	0	1000	0	0.000	0.000		100	1000	0	1000	0	0.000	0.000		100	1000	0	1000	0	0.000	0.000		100	1000
[truncated: 12 more columns]

## Sheet: Drug - Disease
	Settings 1: Minimal 3 co-publications and R-scaled score >= 20								Settings 1: Minimal 3 co-publications and R-scaled score >= 20								Settings 2: Minimal 2 co-publications and R-scaled score >= 20								Settings 2: Minimal 2 co-publications and R-scaled score >= 20								Settings 3: Minimal 1 co-publications and R-scaled score >= 20								Settings 3: Minimal 1 co-publications and R-scaled score >= 20								Settings 4: Minimal 1 co-publications and R-scaled score >= 35
	Area Under Curve (AUC): 0.84								Area Under Curve (AUC): 0.85								Area Under Curve (AUC): 0.83								Area Under Curve (AUC): 0.83								Area Under Curve (AUC): 0.77								Area Under Curve (AUC): 0.77								Area Under Curve (AUC): 0.69
	Intermediates: genes only										Intermediates: genes, biological processes and pathways						Intermediates: genes only								Intermediates: genes, biological processes and pathways								Intermediates: genes only								Intermediates: genes, biological processes and pathways								Intermediates: genes only
	Positive		Negative						Positive		Negative						Positive		Negative						Positive		Negative						Positive		Negative						Positive		Negative						Positive
Inferred R-scaled score	Below cutoff	Above cutoff	Below cutoff	Above cutoff	True positive rate	False positive rate		Inferred R-scaled score	Below cutoff	Above cutoff	Below cutoff	Above cutoff	True positive rate	False positive rate		Inferred R-scaled score	Below cutoff	Above cutoff	Below cutoff	Above cutoff	True positive rate	False positive rate		Inferred R-scaled score	Below cutoff	Above cutoff	Below cutoff	Above cutoff	True positive rate	False positive rate		Inferred R-scaled score	Below cutoff	Above cutoff	Below cutoff	Above cutoff	True positive rate	False positive rate		Inferred R-scaled score	Below cutoff	Above cutoff	Below cutoff	Above cutoff	True positive rate	False positive rate		Inferred R-scaled score	Below cutoff
20	0	318	0	1000	1000	1000		20	0	482	0	1000	1000	1000		20	0	604	0	1000	1000	1000		20	0	866	0	1000	1000	1000		20	0	1000	0	1000	1000	1000		20	0	1000	0	1000	1000	1000		20	0
21	0	318	0	1000	1000	1000		21	0	482	0	1000	1000	1000		21	0	604	0	1000	1000	1000		21	0	866	0	1000	1000	1000		21	0	1000	0	1000	1000	1000		21	0	1000	0	1000	1000	1000		21	0
22	0	318	4	996	1000	0.996		22	0	482	1	999	1000	0.999		22	0	604	1	999	1000	0.999		22	0	866	1	999	1000	0.999		22	0	1000	0	1000	1000	1000		22	1	999	1	999	0.999	0.999		22	0
23	0	318	13	987	1000	0.987		23	0	482	14	986	1000	0.986		23	2	602	8	992	0.997	0.992		23	1	865	4	996	0.999	0.996		23	0	1000	6	994	1000	0.994		23	3	997	3	997	0.997	0.997		23	0
24	0	318	40	960	1000	0.960		24	0	482	36	964	1000	0.964		24	5	599	35	965	0.992	0.965		24	5	861	25	975	0.994	0.975		24	5	995	31	969	0.995	0.969		24	11	989	24	976	0.989	0.976		24	0
25	1	317	86	914	0.997	0.914		25	4	478	116	884	0.992	0.884		25	11	593	94	906	0.982	0.906		25	17	849	85	915	0.980	0.915		25	20	980	85	915	0.980	0.915		25	26	974	76	924	0.974	0.924		25	0
26	5	313	187	813	0.984	0.813		26	9	473	214	786	0.981	0.786		26	26	578	186	814	0.957	0.814		26	37	829	204	796	0.957	0.796		26	42	958	177	823	0.958	0.823		26	52	948	178	822	0.948	0.822		26	0
27	11	307	327	673	0.965	0.673		27	23	459	345	655	0.952	0.655		27	42	562	343	657	0.930	0.657		27	72	794	349	651	0.917	0.651		27	104	896	303	697	0.896	0.697		27	109	891	322	678	0.891	0.678		27	0
28	23	295	461	539	0.928	0.539		28	48	434	515	485	0.900	0.485		28	71	533	494	506	0.882	0.506		28	120	746	510	490	0.861	0.490		28	161	839	465	535	0.839	0.535		28	179	821	485	515	0.821	0.515		28	0
29	37	281	585	415	0.884	0.415		29	73	409	638	362	0.849	0.362		29	101	503	637	363	0.833	0.363		29	176	690	647	353	0.797	0.353		29	245	755	608	392	0.755	0.392		29	276	724	642	358	0.724	0.358		29	0
30	64	254	707	293	0.799	0.293		30	103	379	754	246	0.786	0.246		30	157	447	743	257	0.740	0.257		30	247	619	767	233	0.715	0.233		30	344	656	733	267	0.656	0.267		30	382	618	744	256	0.618	0.256		30	0
31	85	233	792	208	0.733	0.208		31	136	346	839	161	0.718	0.161		31	209	395	826	174	0.654	0.174		31	326	540	850	150	0.624	0.150		31	461	539	812	188	0.539	0.188		31	500	500	838	162	0.500	0.162		31	0
32	115	203	860	140	0.638	0.140		32	177	305	896	104	0.633	0.104		32	272	332	892	108	0.550	0.108		32	422	444	911	89	0.513	0.089		32	595	405	884	116	0.405	0.116		32	612	388	902	98	0.388	0.098		32	0
33	137	181	913	87	0.569	0.087		33	221	261	937	63	0.541	0.063		33	335	269	936	64	0.445	0.064		33	511	355	951	49	0.410	0.049		33	696	304	928	72	0.304	0.072		33	703	297	940	60	0.297	0.060		33	0
34	181	137	949	51	0.431	0.051		34	288	194	966	34	0.402	0.034		34	400	204	960	40	0.338	0.040		34	592	274	969	31	0.316	0.031		34	773	227	955	45	0.227	0.045		34	785	215	966	34	0.215	0.034		34	0
35	214	104	964	36	0.327	0.036		35	335	147	981	19	0.305	0.019		35	449	155	980	20	0.257	0.020		35	674	192	980	20	0.222	0.020		35	847	153	972	28	0.153	0.028		35	853	147	980	20	0.147	0.020		35	0
36	246	72	976	24	0.226	0.024		36	387	95	989	11	0.197	0.011		36	489	115	984	16	0.190	0.016		36	718	148	987	13	0.171	0.013		36	893	107	983	17	0.107	0.017		36	900	100	986	14	0.100	0.014		36	3
37	263	55	985	15	0.173	0.015		37	410	72	995	5	0.149	0.005		37	512	92	992	8	0.152	0.008		37	756	110	995	5	0.127	0.005		37	921	79	988	12	0.079	0.012		37	935	65	991	9	0.065	0.009		37	33
38	277	41	996	4	0.129	0.004		38	425	57	998	2	0.118	0.002		38	538	66	995	5	0.109	0.005		38	794	72	997	3	0.083	0.003		38	949	51	991	9	0.051	0.009		38	953	47	997	3	0.047	0.003		38	115
39	288	30	997	3	0.094	0.003		39	443	39	998	2	0.081	0.002		39	555	49	998	2	0.081	0.002		39	812	54	998	2	0.062	0.002		39	967	33	994	6	0.033	0.006		39	970	30	998	2	0.030	0.002		39	225
40	296	22	998	2	0.069	0.002		40	457	25	999	1	0.052	0.001		40	570	34	999	1	0.056	0.001		40	832	34	999	1	0.039	0.001		40	982	18	995	5	0.018	0.005		40	981	19	999	1	0.019	0.001		40	327
41	306	12	998	2	0.038	0.002		41	462	20	999	1	0.041	0.001		41	582	22	1000	0	0.036	0.000		41	840	26	1000	0	0.030	0.000		41	991	9	997	3	0.009	0.003		41	987	13	999	1	0.013	0.001		41	405
42	308	10	999	1	0.031	0.001		42	470	12	1000	0	0.025	0.000		42	588	16	1000	0	0.026	0.000		42	850	16	1000	0	0.018	0.000		42	992	8	997	3	0.008	0.003		42	995	5	999	1	0.005	0.001		42	454
43	311	7	1000	0	0.022	0.000		43	474	8	1000	0	0.017	0.000		43	595	9	1000	0	0.015	0.000		43	856	10	1000	0	0.012	0.000		43	996	4	997	3	0.004	0.003		43	997	3	1000	0	0.003	0.000		43	481
44	314	4	1000	0	0.013	0.000		44	474	8	1000	0	0.017	0.000		44	599	5	1000	0	0.008	0.000		44	857	9	1000	0	0.010	0.000		44	999	1	999	1	0.001	0.001		44	999	1	1000	0	0.001	0.000		44	503
45	314	4	1000	0	0.013	0.000		45	476	6	1000	0	0.012	0.000		45	601	3	1000	0	0.005	0.000		45	859	7	1000	0	0.008	0.000		45	999	1	999	1	0.001	0.001		45	999	1	1000	0	0.001	0.000		45	516
46	316	2	1000	0	0.006	0.000		46	479	3	1000	0	0.006	0.000		46	602	2	1000	0	0.003	0.000		46	860	6	1000	0	0.007	0.000		46	999	1	999	1	0.001	0.001		46	1000	0	1000	0	0.000	0.000		46	525
47	317	1	1000	0	0.003	0.000		47	481	1	1000	0	0.002	0.000		47	603	1	1000	0	0.002	0.000		47	861	5	1000	0	0.006	0.000		47	1000	0	999	1	0.000	0.001		47	1000	0	1000	0	0.000	0.000		47	530
48	318	0	1000	0	0.000	0.000		48	481	1	1000	0	0.002	0.000		48	604	0	1000	0	0.000	0.000		48	861	5	1000	0	0.006	0.000		48	1000	0	999	1	0.000	0.001		48	1000	0	1000	0	0.000	0.000		48	530
49	318	0	1000	0	0.000	0.000		49	481	1	1000	0	0.002	0.000		49	604	0	1000	0	0.000	0.000		49	862	4	1000	0	0.005	0.000		49	1000	0	1000	0	0.000	0.000		49	1000	0	1000	0	0.000	0.000		49	531
50	318	0	1000	0	0.000	0.000		50	481	1	1000	0	0.002	0.000		50	604	0	1000	0	0.000	0.000		50	865	1	1000	0	0.001	0.000		50	1000	0	1000	0	0.000	0.000		50	1000	0	1000	0	0.000	0.000		50	531
51	318	0	1000	0	0.000	0.000		51	481	1	1000	0	0.002	0.000		51	604	0	1000	0	0.000	0.000		51	865	1	1000	0	0.001	0.000		51	1000	0	1000	0	0.000	0.000		51	1000	0	1000	0	0.000	0.000		51	531
52	318	0	1000	0	0.000	0.000		52	481	1	1000	0	0.002	0.000		52	604	0	1000	0	0.000	0.000		52	865	1	1000	0	0.001	0.000		52	1000	0	1000	0	0.000	0.000		52	1000	0	1000	0	0.000	0.000		52	532
53	318	0	1000	0	0.000	0.000		53	481	1	1000	0	0.002	0.000		53	604	0	1000	0	0.000	0.000		53	866	0	1000	0	0.000	0.000		53	1000	0	1000	0	0.000	0.000		53	1000	0	1000	0	0.000	0.000		53	532
54	318	0	1000	0	0.000	0.000		54	482	0	1000	0	0.000	0.000		54	604	0	1000	0	0.000	0.000		54	866	0	1000	0	0.000	0.000		54	1000	0	1000	0	0.000	0.000		54	1000	0	1000	0	0.000	0.000		54	532
55	318	0	1000	0	0.000	0.000		55	482	0	1000	0	0.000	0.000		55	604	0	1000	0	0.000	0.000		55	866	0	1000	0	0.000	0.000		55	1000	0	1000	0	0.000	0.000		55	1000	0	1000	0	0.000	0.000		55	532
56	318	0	1000	0	0.000	0.000		56	482	0	1000	0	0.000	0.000		56	604	0	1000	0	0.000	0.000		56	866	0	1000	0	0.000	0.000		56	1000	0	1000	0	0.000	0.000		56	1000	0	1000	0	0.000	0.000		56	532
57	318	0	1000	0	0.000	0.000		57	482	0	1000	0	0.000	0.000		57	604	0	1000	0	0.000	0.000		57	866	0	1000	0	0.000	0.000		57	1000	0	1000	0	0.000	0.000		57	1000	0	1000	0	0.000	0.000		57	532
58	318	0	1000	0	0.000	0.000		58	482	0	1000	0	0.000	0.000		58	604	0	1000	0	0.000	0.000		58	866	0	1000	0	0.000	0.000		58	1000	0	1000	0	0.000	0.000		58	1000	0	1000	0	0.000	0.000		58	532
59	318	0	1000	0	0.000	0.000		59	482	0	1000	0	0.000	0.000		59	604	0	1000	0	0.000	0.000		59	866	0	1000	0	0.000	0.000		59	1000	0	1000	0	0.000	0.000		59	1000	0	1000	0	0.000	0.000		59	532
60	318	0	1000	0	0.000	0.000		60	482	0	1000	0	0.000	0.000		60	604	0	1000	0	0.000	0.000		60	866	0	1000	0	0.000	0.000		60	1000	0	1000	0	0.000	0.000		60	1000	0	1000	0	0.000	0.000		60	532
61	318	0	1000	0	0.000	0.000		61	482	0	1000	0	0.000	0.000		61	604	0	1000	0	0.000	0.000		61	866	0	1000	0	0.000	0.000		61	1000	0	1000	0	0.000	0.000		61	1000	0	1000	0	0.000	0.000		61	532
62	318	0	1000	0	0.000	0.000		62	482	0	1000	0	0.000	0.000		62	604	0	1000	0	0.000	0.000		62	866	0	1000	0	0.000	0.000		62	1000	0	1000	0	0.000	0.000		62	1000	0	1000	0	0.000	0.000		62	532
63	318	0	1000	0	0.000	0.000		63	482	0	1000	0	0.000	0.000		63	604	0	1000	0	0.000	0.000		63	866	0	1000	0	0.000	0.000		63	1000	0	1000	0	0.000	0.000		63	1000	0	1000	0	0.000	0.000		63	532
64	318	0	1000	0	0.000	0.000		64	482	0	1000	0	0.000	0.000		64	604	0	1000	0	0.000	0.000		64	866	0	1000	0	0.000	0.000		64	1000	0	1000	0	0.000	0.000		64	1000	0	1000	0	0.000	0.000		64	532
65	318	0	1000	0	0.000	0.000		65	482	0	1000	0	0.000	0.000		65	604	0	1000	0	0.000	0.000		65	866	0	1000	0	0.000	0.000		65	1000	0	1000	0	0.000	0.000		65	1000	0	1000	0	0.000	0.000		65	532
66	318	0	1000	0	0.000	0.000		66	482	0	1000	0	0.000	0.000		66	604	0	1000	0	0.000	0.000		66	866	0	1000	0	0.000	0.000		66	1000	0	1000	0	0.000	0.000		66	1000	0	1000	0	0.000	0.000		66	532
67	318	0	1000	0	0.000	0.000		67	482	0	1000	0	0.000	0.000		67	604	0	1000	0	0.000	0.000		67	866	0	1000	0	0.000	0.000		67	1000	0	1000	0	0.000	0.000		67	1000	0	1000	0	0.000	0.000		67	532
68	318	0	1000	0	0.000	0.000		68	482	0	1000	0	0.000	0.000		68	604	0	1000	0	0.000	0.000		68	866	0	1000	0	0.000	0.000		68	1000	0	1000	0	0.000	0.000		68	1000	0	1000	0	0.000	0.000		68	532
69	318	0	1000	0	0.000	0.000		69	482	0	1000	0	0.000	0.000		69	604	0	1000	0	0.000	0.000		69	866	0	1000	0	0.000	0.000		69	1000	0	1000	0	0.000	0.000		69	1000	0	1000	0	0.000	0.000		69	532
70	318	0	1000	0	0.000	0.000		70	482	0	1000	0	0.000	0.000		70	604	0	1000	0	0.000	0.000		70	866	0	1000	0	0.000	0.000		70	1000	0	1000	0	0.000	0.000		70	1000	0	1000	0	0.000	0.000		70	532
71	318	0	1000	0	0.000	0.000		71	482	0	1000	0	0.000	0.000		71	604	0	1000	0	0.000	0.000		71	866	0	1000	0	0.000	0.000		71	1000	0	1000	0	0.000	0.000		71	1000	0	1000	0	0.000	0.000		71	532
72	318	0	1000	0	0.000	0.000		72	482	0	1000	0	0.000	0.000		72	604	0	1000	0	0.000	0.000		72	866	0	1000	0	0.000	0.000		72	1000	0	1000	0	0.000	0.000		72	1000	0	1000	0	0.000	0.000		72	532
73	318	0	1000	0	0.000	0.000		73	482	0	1000	0	0.000	0.000		73	604	0	1000	0	0.000	0.000		73	866	0	1000	0	0.000	0.000		73	1000	0	1000	0	0.000	0.000		73	1000	0	1000	0	0.000	0.000		73	532
74	318	0	1000	0	0.000	0.000		74	482	0	1000	0	0.000	0.000		74	604	0	1000	0	0.000	0.000		74	866	0	1000	0	0.000	0.000		74	1000	0	1000	0	0.000	0.000		74	1000	0	1000	0	0.000	0.000		74	532
75	318	0	1000	0	0.000	0.000		75	482	0	1000	0	0.000	0.000		75	604	0	1000	0	0.000	0.000		75	866	0	1000	0	0.000	0.000		75	1000	0	1000	0	0.000	0.000		75	1000	0	1000	0	0.000	0.000		75	532
76	318	0	1000	0	0.000	0.000		76	482	0	1000	0	0.000	0.000		76	604	0	1000	0	0.000	0.000		76	866	0	1000	0	0.000	0.000		76	1000	0	1000	0	0.000	0.000		76	1000	0	1000	0	0.000	0.000		76	532
77	318	0	1000	0	0.000	0.000		77	482	0	1000	0	0.000	0.000		77	604	0	1000	0	0.000	0.000		77	866	0	1000	0	0.000	0.000		77	1000	0	1000	0	0.000	0.000		77	1000	0	1000	0	0.000	0.000		77	532
78	318	0	1000	0	0.000	0.000		78	482	0	1000	0	0.000	0.000		78	604	0	1000	0	0.000	0.000		78	866	0	1000	0	0.000	0.000		78	1000	0	1000	0	0.000	0.000		78	1000	0	1000	0	0.000	0.000		78	532
79	318	0	1000	0	0.000	0.000		79	482	0	1000	0	0.000	0.000		79	604	0	1000	0	0.000	0.000		79	866	0	1000	0	0.000	0.000		79	1000	0	1000	0	0.000	0.000		79	1000	0	1000	0	0.000	0.000		79	532
80	318	0	1000	0	0.000	0.000		80	482	0	1000	0	0.000	0.000		80	604	0	1000	0	0.000	0.000		80	866	0	1000	0	0.000	0.000		80	1000	0	1000	0	0.000	0.000		80	1000	0	1000	0	0.000	0.000		80	532
81	318	0	1000	0	0.000	0.000		81	482	0	1000	0	0.000	0.000		81	604	0	1000	0	0.000	0.000		81	866	0	1000	0	0.000	0.000		81	1000	0	1000	0	0.000	0.000		81	1000	0	1000	0	0.000	0.000		81	532
82	318	0	1000	0	0.000	0.000		82	482	0	1000	0	0.000	0.000		82	604	0	1000	0	0.000	0.000		82	866	0	1000	0	0.000	0.000		82	1000	0	1000	0	0.000	0.000		82	1000	0	1000	0	0.000	0.000		82	532
83	318	0	1000	0	0.000	0.000		83	482	0	1000	0	0.000	0.000		83	604	0	1000	0	0.000	0.000		83	866	0	1000	0	0.000	0.000		83	1000	0	1000	0	0.000	0.000		83	1000	0	1000	0	0.000	0.000		83	532
84	318	0	1000	0	0.000	0.000		84	482	0	1000	0	0.000	0.000		84	604	0	1000	0	0.000	0.000		84	866	0	1000	0	0.000	0.000		84	1000	0	1000	0	0.000	0.000		84	1000	0	1000	0	0.000	0.000		84	532
85	318	0	1000	0	0.000	0.000		85	482	0	1000	0	0.000	0.000		85	604	0	1000	0	0.000	0.000		85	866	0	1000	0	0.000	0.000		85	1000	0	1000	0	0.000	0.000		85	1000	0	1000	0	0.000	0.000		85	532
86	318	0	1000	0	0.000	0.000		86	482	0	1000	0	0.000	0.000		86	604	0	1000	0	0.000	0.000		86	866	0	1000	0	0.000	0.000		86	1000	0	1000	0	0.000	0.000		86	1000	0	1000	0	0.000	0.000		86	532
87	318	0	1000	0	0.000	0.000		87	482	0	1000	0	0.000	0.000		87	604	0	1000	0	0.000	0.000		87	866	0	1000	0	0.000	0.000		87	1000	0	1000	0	0.000	0.000		87	1000	0	1000	0	0.000	0.000		87	532
88	318	0	1000	0	0.000	0.000		88	482	0	1000	0	0.000	0.000		88	604	0	1000	0	0.000	0.000		88	866	0	1000	0	0.000	0.000		88	1000	0	1000	0	0.000	0.000		88	1000	0	1000	0	0.000	0.000		88	532
89	318	0	1000	0	0.000	0.000		89	482	0	1000	0	0.000	0.000		89	604	0	1000	0	0.000	0.000		89	866	0	1000	0	0.000	0.000		89	1000	0	1000	0	0.000	0.000		89	1000	0	1000	0	0.000	0.000		89	532
90	318	0	1000	0	0.000	0.000		90	482	0	1000	0	0.000	0.000		90	604	0	1000	0	0.000	0.000		90	866	0	1000	0	0.000	0.000		90	1000	0	1000	0	0.000	0.000		90	1000	0	1000	0	0.000	0.000		90	532
91	318	0	1000	0	0.000	0.000		91	482	0	1000	0	0.000	0.000		91	604	0	1000	0	0.000	0.000		91	866	0	1000	0	0.000	0.000		91	1000	0	1000	0	0.000	0.000		91	1000	0	1000	0	0.000	0.000		91	532
92	318	0	1000	0	0.000	0.000		92	482	0	1000	0	0.000	0.000		92	604	0	1000	0	0.000	0.000		92	866	0	1000	0	0.000	0.000		92	1000	0	1000	0	0.000	0.000		92	1000	0	1000	0	0.000	0.000		92	532
93	318	0	1000	0	0.000	0.000		93	482	0	1000	0	0.000	0.000		93	604	0	1000	0	0.000	0.000		93	866	0	1000	0	0.000	0.000		93	1000	0	1000	0	0.000	0.000		93	1000	0	1000	0	0.000	0.000		93	532
94	318	0	1000	0	0.000	0.000		94	482	0	1000	0	0.000	0.000		94	604	0	1000	0	0.000	0.000		94	866	0	1000	0	0.000	0.000		94	1000	0	1000	0	0.000	0.000		94	1000	0	1000	0	0.000	0.000		94	532
95	318	0	1000	0	0.000	0.000		95	482	0	1000	0	0.000	0.000		95	604	0	1000	0	0.000	0.000		95	866	0	1000	0	0.000	0.000		95	1000	0	1000	0	0.000	0.000		95	1000	0	1000	0	0.000	0.000		95	532
96	318	0	1000	0	0.000	0.000		96	482	0	1000	0	0.000	0.000		96	604	0	1000	0	0.000	0.000		96	866	0	1000	0	0.000	0.000		96	1000	0	1000	0	0.000	0.000		96	1000	0	1000	0	0.000	0.000		96	532
97	318	0	1000	0	0.000	0.000		97	482	0	1000	0	0.000	0.000		97	604	0	1000	0	0.000	0.000		97	866	0	1000	0	0.000	0.000		97	1000	0	1000	0	0.000	0.000		97	1000	0	1000	0	0.000	0.000		97	532
98	318	0	1000	0	0.000	0.000		98	482	0	1000	0	0.000	0.000		98	604	0	1000	0	0.000	0.000		98	866	0	1000	0	0.000	0.000		98	1000	0	1000	0	0.000	0.000		98	1000	0	1000	0	0.000	0.000		98	532
99	318	0	1000	0	0.000	0.000		99	482	0	1000	0	0.000	0.000		99	604	0	1000	0	0.000	0.000		99	866	0	1000	0	0.000	0.000		99	1000	0	1000	0	0.000	0.000		99	1000	0	1000	0	0.000	0.000		99	532
100	318	0	1000	0	0.000	0.000		100	482	0	1000	0	0.000	0.000		100	604	0	1000	0	0.000	0.000		100	866	0	1000	0	0.000	0.000		100	1000	0	1000	0	0.000	0.000		100	1000	0	1000	0	0.000	0.000		100	532
[truncated: 12 more columns]

## Sheet: Drug - Biological Process
	Settings 1: Minimal 3 co-publications and R-scaled score >= 20								Settings 1: Minimal 3 co-publications and R-scaled score >= 20								Settings 2: Minimal 2 co-publications and R-scaled score >= 20								Settings 2: Minimal 2 co-publications and R-scaled score >= 20								Settings 3: Minimal 1 co-publications and R-scaled score >= 20								Settings 3: Minimal 1 co-publications and R-scaled score >= 20								Settings 4: Minimal 1 co-publications and R-scaled score >= 35
	Area Under Curve (AUC): 0.87								Area Under Curve (AUC): 0.87								Area Under Curve (AUC): 0.84								Area Under Curve (AUC): 0.84								Area Under Curve (AUC): 0.77								Area Under Curve (AUC): 0.76								Area Under Curve (AUC): 0.70
	Intermediates: genes only										Intermediates: genes, biological processes and pathways						Intermediates: genes only								Intermediates: genes, biological processes and pathways								Intermediates: genes only								Intermediates: genes, biological processes and pathways								Intermediates: genes only
	Positive		Negative						Positive		Negative						Positive		Negative						Positive		Negative						Positive		Negative						Positive		Negative						Positive
Inferred R-scaled score	Below cutoff	Above cutoff	Below cutoff	Above cutoff	True positive rate	False positive rate		Inferred R-scaled score	Below cutoff	Above cutoff	Below cutoff	Above cutoff	True positive rate	False positive rate		Inferred R-scaled score	Below cutoff	Above cutoff	Below cutoff	Above cutoff	True positive rate	False positive rate		Inferred R-scaled score	Below cutoff	Above cutoff	Below cutoff	Above cutoff	True positive rate	False positive rate		Inferred R-scaled score	Below cutoff	Above cutoff	Below cutoff	Above cutoff	True positive rate	False positive rate		Inferred R-scaled score	Below cutoff	Above cutoff	Below cutoff	Above cutoff	True positive rate	False positive rate		Inferred R-scaled score	Below cutoff
20	0	549	0	1000	1000	1000		20	0	879	0	1000	1000	1000		20	0	934	0	1000	1000	1000		20	0	1000	0	1000	1000	1000		20	0	1000	0	1000	1000	1000		20	0	1000	0	1000	1000	1000		20	0
21	0	549	0	1000	1000	1000		21	0	879	0	1000	1000	1000		21	0	934	0	1000	1000	1000		21	0	1000	0	1000	1000	1000		21	0	1000	0	1000	1000	1000		21	0	1000	0	1000	1000	1000		21	0
22	0	549	0	1000	1000	1000		22	0	879	0	1000	1000	1000		22	0	934	0	1000	1000	1000		22	0	1000	0	1000	1000	1000		22	0	1000	0	1000	1000	1000		22	0	1000	0	1000	1000	1000		22	0
23	0	549	1	999	1000	0.999		23	0	879	3	997	1000	0.997		23	0	934	2	998	1000	0.998		23	0	1000	0	1000	1000	1000		23	0	1000	0	1000	1000	1000		23	0	1000	1	999	1000	0.999		23	0
24	0	549	6	994	1000	0.994		24	0	879	10	990	1000	0.990		24	0	934	4	996	1000	0.996		24	0	1000	5	995	1000	0.995		24	0	1000	3	997	1000	0.997		24	0	1000	2	998	1000	0.998		24	0
25	0	549	16	984	1000	0.984		25	0	879	24	976	1000	0.976		25	0	934	17	983	1000	0.983		25	0	1000	12	988	1000	0.988		25	1	999	9	991	0.999	0.991		25	1	999	7	993	0.999	0.993		25	0
26	0	549	53	947	1000	0.947		26	1	878	53	947	0.999	0.947		26	0	934	45	955	1000	0.955		26	1	999	41	959	0.999	0.959		26	1	999	25	975	0.999	0.975		26	2	998	27	973	0.998	0.973		26	0
27	0	549	102	898	1000	0.898		27	2	877	109	891	0.998	0.891		27	6	928	95	905	0.994	0.905		27	7	993	101	899	0.993	0.899		27	8	992	62	938	0.992	0.938		27	5	995	72	928	0.995	0.928		27	0
28	2	547	188	812	0.996	0.812		28	5	874	188	812	0.994	0.812		28	10	924	178	822	0.989	0.822		28	18	982	175	825	0.982	0.825		28	18	982	138	862	0.982	0.862		28	15	985	140	860	0.985	0.860		28	0
29	7	542	302	698	0.987	0.698		29	16	863	305	695	0.982	0.695		29	24	910	281	719	0.974	0.719		29	35	965	271	729	0.965	0.729		29	35	965	219	781	0.965	0.781		29	31	969	227	773	0.969	0.773		29	0
30	12	537	424	576	0.978	0.576		30	25	854	429	571	0.972	0.571		30	43	891	403	597	0.954	0.597		30	51	949	391	609	0.949	0.609		30	61	939	327	673	0.939	0.673		30	69	931	325	675	0.931	0.675		30	0
31	18	531	527	473	0.967	0.473		31	36	843	532	468	0.959	0.468		31	72	862	514	486	0.923	0.486		31	84	916	501	499	0.916	0.499		31	103	897	435	565	0.897	0.565		31	110	890	446	554	0.890	0.554		31	0
32	34	515	643	357	0.938	0.357		32	61	818	641	359	0.931	0.359		32	109	825	625	375	0.883	0.375		32	130	870	606	394	0.870	0.394		32	170	830	560	440	0.830	0.440		32	166	834	553	447	0.834	0.447		32	0
33	59	490	745	255	0.893	0.255		33	99	780	737	263	0.887	0.263		33	154	780	719	281	0.835	0.281		33	183	817	701	299	0.817	0.299		33	232	768	662	338	0.768	0.338		33	222	778	654	346	0.778	0.346		33	0
34	98	451	817	183	0.821	0.183		34	153	726	809	191	0.826	0.191		34	222	712	808	192	0.762	0.192		34	267	733	777	223	0.733	0.223		34	323	677	757	243	0.677	0.243		34	320	680	744	256	0.680	0.256		34	0
35	140	409	855	145	0.745	0.145		35	237	642	861	139	0.730	0.139		35	318	616	855	145	0.660	0.145		35	346	654	832	168	0.654	0.168		35	405	595	826	174	0.595	0.174		35	437	563	816	184	0.563	0.184		35	0
36	183	366	894	106	0.667	0.106		36	301	578	896	104	0.658	0.104		36	386	548	904	96	0.587	0.096		36	428	572	896	104	0.572	0.104		36	500	500	877	123	0.500	0.123		36	521	479	865	135	0.479	0.135		36	2
37	216	333	926	74	0.607	0.074		37	376	503	931	69	0.572	0.069		37	457	477	927	73	0.511	0.073		37	513	487	933	67	0.487	0.067		37	579	421	911	89	0.421	0.089		37	592	408	911	89	0.408	0.089		37	18
38	259	290	948	52	0.528	0.052		38	445	434	952	48	0.494	0.048		38	522	412	948	52	0.441	0.052		38	601	399	956	44	0.399	0.044		38	663	337	934	66	0.337	0.066		38	683	317	937	63	0.317	0.063		38	86
39	302	247	963	37	0.450	0.037		39	528	351	970	30	0.399	0.030		39	599	335	963	37	0.359	0.037		39	684	316	967	33	0.316	0.033		39	724	276	957	43	0.276	0.043		39	747	253	953	47	0.253	0.047		39	201
40	357	192	974	26	0.350	0.026		40	600	279	980	20	0.317	0.020		40	665	269	973	27	0.288	0.027		40	758	242	977	23	0.242	0.023		40	788	212	968	32	0.212	0.032		40	809	191	966	34	0.191	0.034		40	339
41	395	154	981	19	0.281	0.019		41	669	210	987	13	0.239	0.013		41	717	217	983	17	0.232	0.017		41	816	184	984	16	0.184	0.016		41	842	158	979	21	0.158	0.021		41	857	143	976	24	0.143	0.024		41	498
42	429	120	987	13	0.219	0.013		42	720	159	989	11	0.181	0.011		42	772	162	991	9	0.173	0.009		42	858	142	988	12	0.142	0.012		42	901	99	983	17	0.099	0.017		42	889	111	982	18	0.111	0.018		42	644
43	457	92	990	10	0.168	0.010		43	750	129	993	7	0.147	0.007		43	802	132	993	7	0.141	0.007		43	887	113	994	6	0.113	0.006		43	924	76	985	15	0.076	0.015		43	920	80	991	9	0.080	0.009		43	747
44	476	73	994	6	0.133	0.006		44	781	98	996	4	0.111	0.004		44	837	97	998	2	0.104	0.002		44	921	79	996	4	0.079	0.004		44	946	54	990	10	0.054	0.010		44	946	54	995	5	0.054	0.005		44	820
45	501	48	998	2	0.087	0.002		45	810	69	997	3	0.078	0.003		45	867	67	999	1	0.072	0.001		45	942	58	998	2	0.058	0.002		45	962	38	994	6	0.038	0.006		45	963	37	997	3	0.037	0.003		45	890
46	512	37	999	1	0.067	0.001		46	830	49	998	2	0.056	0.002		46	884	50	1000	0	0.054	0.000		46	959	41	999	1	0.041	0.001		46	974	26	996	4	0.026	0.004		46	974	26	999	1	0.026	0.001		46	926
47	524	25	999	1	0.046	0.001		47	843	36	999	1	0.041	0.001		47	894	40	1000	0	0.043	0.000		47	970	30	999	1	0.030	0.001		47	981	19	998	2	0.019	0.002		47	981	19	1000	0	0.019	0.000		47	956
48	526	23	999	1	0.042	0.001		48	852	27	999	1	0.031	0.001		48	905	29	1000	0	0.031	0.000		48	979	21	999	1	0.021	0.001		48	984	16	998	2	0.016	0.002		48	988	12	1000	0	0.012	0.000		48	966
49	530	19	999	1	0.035	0.001		49	859	20	999	1	0.023	0.001		49	914	20	1000	0	0.021	0.000		49	986	14	999	1	0.014	0.001		49	989	11	999	1	0.011	0.001		49	990	10	1000	0	0.010	0.000		49	982
50	534	15	999	1	0.027	0.001		50	862	17	999	1	0.019	0.001		50	922	12	1000	0	0.013	0.000		50	988	12	999	1	0.012	0.001		50	991	9	1000	0	0.009	0.000		50	992	8	1000	0	0.008	0.000		50	986
51	537	12	999	1	0.022	0.001		51	865	14	999	1	0.016	0.001		51	923	11	1000	0	0.012	0.000		51	989	11	999	1	0.011	0.001		51	992	8	1000	0	0.008	0.000		51	994	6	1000	0	0.006	0.000		51	987
52	540	9	999	1	0.016	0.001		52	872	7	999	1	0.008	0.001		52	926	8	1000	0	0.009	0.000		52	992	8	999	1	0.008	0.001		52	993	7	1000	0	0.007	0.000		52	995	5	1000	0	0.005	0.000		52	990
53	542	7	999	1	0.013	0.001		53	873	6	999	1	0.007	0.001		53	927	7	1000	0	0.007	0.000		53	993	7	1000	0	0.007	0.000		53	994	6	1000	0	0.006	0.000		53	997	3	1000	0	0.003	0.000		53	993
54	545	4	999	1	0.007	0.001		54	873	6	1000	0	0.007	0.000		54	928	6	1000	0	0.006	0.000		54	996	4	1000	0	0.004	0.000		54	996	4	1000	0	0.004	0.000		54	997	3	1000	0	0.003	0.000		54	995
55	546	3	999	1	0.005	0.001		55	876	3	1000	0	0.003	0.000		55	931	3	1000	0	0.003	0.000		55	996	4	1000	0	0.004	0.000		55	997	3	1000	0	0.003	0.000		55	999	1	1000	0	0.001	0.000		55	996
56	547	2	999	1	0.004	0.001		56	877	2	1000	0	0.002	0.000		56	931	3	1000	0	0.003	0.000		56	997	3	1000	0	0.003	0.000		56	998	2	1000	0	0.002	0.000		56	999	1	1000	0	0.001	0.000		56	997
57	549	0	1000	0	0.000	0.000		57	878	1	1000	0	0.001	0.000		57	931	3	1000	0	0.003	0.000		57	998	2	1000	0	0.002	0.000		57	998	2	1000	0	0.002	0.000		57	999	1	1000	0	0.001	0.000		57	999
58	549	0	1000	0	0.000	0.000		58	878	1	1000	0	0.001	0.000		58	932	2	1000	0	0.002	0.000		58	1000	0	1000	0	0.000	0.000		58	998	2	1000	0	0.002	0.000		58	999	1	1000	0	0.001	0.000		58	999
59	549	0	1000	0	0.000	0.000		59	879	0	1000	0	0.000	0.000		59	934	0	1000	0	0.000	0.000		59	1000	0	1000	0	0.000	0.000		59	998	2	1000	0	0.002	0.000		59	999	1	1000	0	0.001	0.000		59	1000
60	549	0	1000	0	0.000	0.000		60	879	0	1000	0	0.000	0.000		60	934	0	1000	0	0.000	0.000		60	1000	0	1000	0	0.000	0.000		60	1000	0	1000	0	0.000	0.000		60	1000	0	1000	0	0.000	0.000		60	1000
61	549	0	1000	0	0.000	0.000		61	879	0	1000	0	0.000	0.000		61	934	0	1000	0	0.000	0.000		61	1000	0	1000	0	0.000	0.000		61	1000	0	1000	0	0.000	0.000		61	1000	0	1000	0	0.000	0.000		61	1000
62	549	0	1000	0	0.000	0.000		62	879	0	1000	0	0.000	0.000		62	934	0	1000	0	0.000	0.000		62	1000	0	1000	0	0.000	0.000		62	1000	0	1000	0	0.000	0.000		62	1000	0	1000	0	0.000	0.000		62	1000
63	549	0	1000	0	0.000	0.000		63	879	0	1000	0	0.000	0.000		63	934	0	1000	0	0.000	0.000		63	1000	0	1000	0	0.000	0.000		63	1000	0	1000	0	0.000	0.000		63	1000	0	1000	0	0.000	0.000		63	1000
64	549	0	1000	0	0.000	0.000		64	879	0	1000	0	0.000	0.000		64	934	0	1000	0	0.000	0.000		64	1000	0	1000	0	0.000	0.000		64	1000	0	1000	0	0.000	0.000		64	1000	0	1000	0	0.000	0.000		64	1000
65	549	0	1000	0	0.000	0.000		65	879	0	1000	0	0.000	0.000		65	934	0	1000	0	0.000	0.000		65	1000	0	1000	0	0.000	0.000		65	1000	0	1000	0	0.000	0.000		65	1000	0	1000	0	0.000	0.000		65	1000
66	549	0	1000	0	0.000	0.000		66	879	0	1000	0	0.000	0.000		66	934	0	1000	0	0.000	0.000		66	1000	0	1000	0	0.000	0.000		66	1000	0	1000	0	0.000	0.000		66	1000	0	1000	0	0.000	0.000		66	1000
67	549	0	1000	0	0.000	0.000		67	879	0	1000	0	0.000	0.000		67	934	0	1000	0	0.000	0.000		67	1000	0	1000	0	0.000	0.000		67	1000	0	1000	0	0.000	0.000		67	1000	0	1000	0	0.000	0.000		67	1000
68	549	0	1000	0	0.000	0.000		68	879	0	1000	0	0.000	0.000		68	934	0	1000	0	0.000	0.000		68	1000	0	1000	0	0.000	0.000		68	1000	0	1000	0	0.000	0.000		68	1000	0	1000	0	0.000	0.000		68	1000
69	549	0	1000	0	0.000	0.000		69	879	0	1000	0	0.000	0.000		69	934	0	1000	0	0.000	0.000		69	1000	0	1000	0	0.000	0.000		69	1000	0	1000	0	0.000	0.000		69	1000	0	1000	0	0.000	0.000		69	1000
70	549	0	1000	0	0.000	0.000		70	879	0	1000	0	0.000	0.000		70	934	0	1000	0	0.000	0.000		70	1000	0	1000	0	0.000	0.000		70	1000	0	1000	0	0.000	0.000		70	1000	0	1000	0	0.000	0.000		70	1000
71	549	0	1000	0	0.000	0.000		71	879	0	1000	0	0.000	0.000		71	934	0	1000	0	0.000	0.000		71	1000	0	1000	0	0.000	0.000		71	1000	0	1000	0	0.000	0.000		71	1000	0	1000	0	0.000	0.000		71	1000
72	549	0	1000	0	0.000	0.000		72	879	0	1000	0	0.000	0.000		72	934	0	1000	0	0.000	0.000		72	1000	0	1000	0	0.000	0.000		72	1000	0	1000	0	0.000	0.000		72	1000	0	1000	0	0.000	0.000		72	1000
73	549	0	1000	0	0.000	0.000		73	879	0	1000	0	0.000	0.000		73	934	0	1000	0	0.000	0.000		73	1000	0	1000	0	0.000	0.000		73	1000	0	1000	0	0.000	0.000		73	1000	0	1000	0	0.000	0.000		73	1000
74	549	0	1000	0	0.000	0.000		74	879	0	1000	0	0.000	0.000		74	934	0	1000	0	0.000	0.000		74	1000	0	1000	0	0.000	0.000		74	1000	0	1000	0	0.000	0.000		74	1000	0	1000	0	0.000	0.000		74	1000
75	549	0	1000	0	0.000	0.000		75	879	0	1000	0	0.000	0.000		75	934	0	1000	0	0.000	0.000		75	1000	0	1000	0	0.000	0.000		75	1000	0	1000	0	0.000	0.000		75	1000	0	1000	0	0.000	0.000		75	1000
76	549	0	1000	0	0.000	0.000		76	879	0	1000	0	0.000	0.000		76	934	0	1000	0	0.000	0.000		76	1000	0	1000	0	0.000	0.000		76	1000	0	1000	0	0.000	0.000		76	1000	0	1000	0	0.000	0.000		76	1000
77	549	0	1000	0	0.000	0.000		77	879	0	1000	0	0.000	0.000		77	934	0	1000	0	0.000	0.000		77	1000	0	1000	0	0.000	0.000		77	1000	0	1000	0	0.000	0.000		77	1000	0	1000	0	0.000	0.000		77	1000
78	549	0	1000	0	0.000	0.000		78	879	0	1000	0	0.000	0.000		78	934	0	1000	0	0.000	0.000		78	1000	0	1000	0	0.000	0.000		78	1000	0	1000	0	0.000	0.000		78	1000	0	1000	0	0.000	0.000		78	1000
79	549	0	1000	0	0.000	0.000		79	879	0	1000	0	0.000	0.000		79	934	0	1000	0	0.000	0.000		79	1000	0	1000	0	0.000	0.000		79	1000	0	1000	0	0.000	0.000		79	1000	0	1000	0	0.000	0.000		79	1000
80	549	0	1000	0	0.000	0.000		80	879	0	1000	0	0.000	0.000		80	934	0	1000	0	0.000	0.000		80	1000	0	1000	0	0.000	0.000		80	1000	0	1000	0	0.000	0.000		80	1000	0	1000	0	0.000	0.000		80	1000
81	549	0	1000	0	0.000	0.000		81	879	0	1000	0	0.000	0.000		81	934	0	1000	0	0.000	0.000		81	1000	0	1000	0	0.000	0.000		81	1000	0	1000	0	0.000	0.000		81	1000	0	1000	0	0.000	0.000		81	1000
82	549	0	1000	0	0.000	0.000		82	879	0	1000	0	0.000	0.000		82	934	0	1000	0	0.000	0.000		82	1000	0	1000	0	0.000	0.000		82	1000	0	1000	0	0.000	0.000		82	1000	0	1000	0	0.000	0.000		82	1000
83	549	0	1000	0	0.000	0.000		83	879	0	1000	0	0.000	0.000		83	934	0	1000	0	0.000	0.000		83	1000	0	1000	0	0.000	0.000		83	1000	0	1000	0	0.000	0.000		83	1000	0	1000	0	0.000	0.000		83	1000
84	549	0	1000	0	0.000	0.000		84	879	0	1000	0	0.000	0.000		84	934	0	1000	0	0.000	0.000		84	1000	0	1000	0	0.000	0.000		84	1000	0	1000	0	0.000	0.000		84	1000	0	1000	0	0.000	0.000		84	1000
85	549	0	1000	0	0.000	0.000		85	879	0	1000	0	0.000	0.000		85	934	0	1000	0	0.000	0.000		85	1000	0	1000	0	0.000	0.000		85	1000	0	1000	0	0.000	0.000		85	1000	0	1000	0	0.000	0.000		85	1000
86	549	0	1000	0	0.000	0.000		86	879	0	1000	0	0.000	0.000		86	934	0	1000	0	0.000	0.000		86	1000	0	1000	0	0.000	0.000		86	1000	0	1000	0	0.000	0.000		86	1000	0	1000	0	0.000	0.000		86	1000
87	549	0	1000	0	0.000	0.000		87	879	0	1000	0	0.000	0.000		87	934	0	1000	0	0.000	0.000		87	1000	0	1000	0	0.000	0.000		87	1000	0	1000	0	0.000	0.000		87	1000	0	1000	0	0.000	0.000		87	1000
88	549	0	1000	0	0.000	0.000		88	879	0	1000	0	0.000	0.000		88	934	0	1000	0	0.000	0.000		88	1000	0	1000	0	0.000	0.000		88	1000	0	1000	0	0.000	0.000		88	1000	0	1000	0	0.000	0.000		88	1000
89	549	0	1000	0	0.000	0.000		89	879	0	1000	0	0.000	0.000		89	934	0	1000	0	0.000	0.000		89	1000	0	1000	0	0.000	0.000		89	1000	0	1000	0	0.000	0.000		89	1000	0	1000	0	0.000	0.000		89	1000
90	549	0	1000	0	0.000	0.000		90	879	0	1000	0	0.000	0.000		90	934	0	1000	0	0.000	0.000		90	1000	0	1000	0	0.000	0.000		90	1000	0	1000	0	0.000	0.000		90	1000	0	1000	0	0.000	0.000		90	1000
91	549	0	1000	0	0.000	0.000		91	879	0	1000	0	0.000	0.000		91	934	0	1000	0	0.000	0.000		91	1000	0	1000	0	0.000	0.000		91	1000	0	1000	0	0.000	0.000		91	1000	0	1000	0	0.000	0.000		91	1000
92	549	0	1000	0	0.000	0.000		92	879	0	1000	0	0.000	0.000		92	934	0	1000	0	0.000	0.000		92	1000	0	1000	0	0.000	0.000		92	1000	0	1000	0	0.000	0.000		92	1000	0	1000	0	0.000	0.000		92	1000
93	549	0	1000	0	0.000	0.000		93	879	0	1000	0	0.000	0.000		93	934	0	1000	0	0.000	0.000		93	1000	0	1000	0	0.000	0.000		93	1000	0	1000	0	0.000	0.000		93	1000	0	1000	0	0.000	0.000		93	1000
94	549	0	1000	0	0.000	0.000		94	879	0	1000	0	0.000	0.000		94	934	0	1000	0	0.000	0.000		94	1000	0	1000	0	0.000	0.000		94	1000	0	1000	0	0.000	0.000		94	1000	0	1000	0	0.000	0.000		94	1000
95	549	0	1000	0	0.000	0.000		95	879	0	1000	0	0.000	0.000		95	934	0	1000	0	0.000	0.000		95	1000	0	1000	0	0.000	0.000		95	1000	0	1000	0	0.000	0.000		95	1000	0	1000	0	0.000	0.000		95	1000
96	549	0	1000	0	0.000	0.000		96	879	0	1000	0	0.000	0.000		96	934	0	1000	0	0.000	0.000		96	1000	0	1000	0	0.000	0.000		96	1000	0	1000	0	0.000	0.000		96	1000	0	1000	0	0.000	0.000		96	1000
97	549	0	1000	0	0.000	0.000		97	879	0	1000	0	0.000	0.000		97	934	0	1000	0	0.000	0.000		97	1000	0	1000	0	0.000	0.000		97	1000	0	1000	0	0.000	0.000		97	1000	0	1000	0	0.000	0.000		97	1000
98	549	0	1000	0	0.000	0.000		98	879	0	1000	0	0.000	0.000		98	934	0	1000	0	0.000	0.000		98	1000	0	1000	0	0.000	0.000		98	1000	0	1000	0	0.000	0.000		98	1000	0	1000	0	0.000	0.000		98	1000
99	549	0	1000	0	0.000	0.000		99	879	0	1000	0	0.000	0.000		99	934	0	1000	0	0.000	0.000		99	1000	0	1000	0	0.000	0.000		99	1000	0	1000	0	0.000	0.000		99	1000	0	1000	0	0.000	0.000		99	1000
100	549	0	1000	0	0.000	0.000		100	879	0	1000	0	0.000	0.000		100	934	0	1000	0	0.000	0.000		100	1000	0	1000	0	0.000	0.000		100	1000	0	1000	0	0.000	0.000		100	1000	0	1000	0	0.000	0.000		100	1000
[truncated: 12 more columns]
